# Supplementary material for: An Evolutionarily Young Polar Bear (Ursus maritimus) Endogenous Retrovirus Identified from Next Generation Sequence Data
Source: MDPI journal article supplement (doi:10.3390/v7112927), 2015-11-24
Supplement: s1 [file s1]

| SW    | perc | perc | perc | query                           | position | in query | matching | repeat         | position          | in repeat | ID     |
|-------|------|------|------|---------------------------------|----------|----------|----------|----------------|-------------------|-----------|--------|
| score | div. | del. | ins. | sequence                        | begin    | end      | repeat   | class/family   | begin             | end       | (left) |
| 375   | 26.8 | 2.6  | 6.2  | scaffold143.3_240,578-3,261,249 | 7        | 157      | (20515)  | C LTR118_Ame   | (331)             | 146       | 1      |
| 373   | 33.3 | 0.0  | 0.0  | scaffold143.3_240,578-3,261,249 | 158      | 298      | (20374)  | C LTR77-int_T5 | (0)               | 5551      | 5411   |
| 826   | 15.7 | 11.6 | 5.5  | scaffold143.3_240,578-3,261,249 | 2025     | 2213     | (18459)  | C SINEC1_Ame   | (0)               | 201       | 2      |
| 329   | 23.3 | 15.8 | 0.0  | scaffold143.3_240,578-3,261,249 | 2652     | 2771     | (17901)  | C LIMS         | (1354)            | 4792      | 4654   |
| 13    | 16.9 | 0.0  | 5.7  | scaffold143.3_240,578-3,261,249 | 2915     | 2951     | (17721)  | + (TTTC)n      | 1                 | 35        | (0)    |
| 413   | 15.2 | 1.3  | 0.0  | scaffold143.3_240,578-3,261,249 | 3229     | 3307     | (17365)  | C MLT1E2       | (0)               | 627       | 548    |
| 845   | 21.0 | 25.6 | 6.5  | scaffold143.3_240,578-3,261,249 | 3306     | 3671     | (17001)  | C MLT1E2       | (191)             | 436       | 1      |
| 2778  | 11.5 | 1.9  | 2.7  | scaffold143.3_240,578-3,261,249 | 3711     | 4163     | (16509)  | + CorLTR7      | LTR/ERV1          | 1         | 433    |
| 1491  | 4.7  | 3.1  | 0.5  | scaffold143.3_240,578-3,261,249 | 4164     | 4357     | (16315)  | C SINEC1_Ame   | (0)               | 201       | 3      |
| 1032  | 7.7  | 0.1  | 20.2 | scaffold143.3_240,578-3,261,249 | 4358     | 4441     | (16231)  | + CorLTR7      | LTR/ERV1          | 415       | 483    |
| 1395  | 22.1 | 5.1  | 4.9  | scaffold143.3_240,578-3,261,249 | 4444     | 4498     | (16174)  | + Charlie4a    | DNA/hAT-Charlie   | 60        | 116    |
| 2286  | 15.5 | 6.3  | 4.7  | scaffold143.3_240,578-3,261,249 | 4951     | 4958     | (15714)  | C MER101B_CF   | LTR/ERV1          | (0)       | 467    |
| 1395  | 22.1 | 5.1  | 4.9  | scaffold143.3_240,578-3,261,249 | 4959     | 5350     | (15322)  | + Charlie4a    | DNA/hAT-Charlie   | 117       | 588    |
| 473   | 27.5 | 11.2 | 0.0  | scaffold143.3_240,578-3,261,249 | 5465     | 5624     | (15048)  | C MLT1         | LTR/ERV1-MaLR     | (315)     | 197    |
| 315   | 14.7 | 7.9  | 1.2  | scaffold143.3_240,578-3,261,249 | 5745     | 5820     | (14852)  | C SINEC_c2     | SINE/rRNA         | (0)       | 212    |
| 480   | 21.6 | 11.7 | 0.0  | scaffold143.3_240,578-3,261,249 | 5822     | 5932     | (14740)  | C SINEC2_Ame   | SINE/rRNA         | (9)       | 124    |
| 646   | 7.8  | 50.0 | 1.0  | scaffold143.3_240,578-3,261,249 | 6217     | 6346     | (14326)  | + SINEC_b2     | SINE/rRNA         | 1         | 193    |
| 512   | 26.5 | 5.3  | 1.9  | scaffold143.3_240,578-3,261,249 | 6448     | 6597     | (14075)  | C LTR86C       | LTR/ERV1          | (2)       | 619    |
| 354   | 29.9 | 4.7  | 0.0  | scaffold143.3_240,578-3,261,249 | 7338     | 7444     | (13228)  | C MIR          | SINE/MIR          | (104)     | 158    |
| 379   | 22.4 | 3.9  | 14.1 | scaffold143.3_240,578-3,261,249 | 7512     | 7667     | (13005)  | + MER92D       | LTR/ERV1          | 179       | 320    |
| 616   | 28.4 | 1.8  | 0.0  | scaffold143.3_240,578-3,261,249 | 7708     | 7876     | (12796)  | + MER5A        | DNA/hAT-Charlie   | 18        | 189    |
| 285   | 32.1 | 7.1  | 0.0  | scaffold143.3_240,578-3,261,249 | 9845     | 9956     | (10716)  | C PlatSat2A    | Satellite         | (671)     | 362    |
| 465   | 22.1 | 3.7  | 2.0  | scaffold143.3_240,578-3,261,249 | 10044    | 10220    | (10452)  | C LTR154       | LTR/ERV1          | (45)      | 462    |
| 1463  | 7.8  | 3.1  | 0.0  | scaffold143.3_240,578-3,261,249 | 10942    | 11134    | (9538)   | C SINEC1_Ame   | SINE/rRNA         | (2)       | 199    |
| 221   | 7.6  | 0.7  | 0.0  | scaffold143.3_240,578-3,261,249 | 11329    | 11460    | (9212)   | + SINEC1B_Ame  | SINE/rRNA         | 1         | 141    |
| 370   | 28.7 | 8.4  | 4.5  | scaffold143.3_240,578-3,261,249 | 12118    | 12332    | (8340)   | C MLT1K        | LTR/ERV1-MaLR     | (63)      | 532    |
| 1250  | 19.7 | 4.6  | 5.8  | scaffold143.3_240,578-3,261,249 | 12440    | 12612    | (8060)   | C L1MB8        | LINE/L1           | (0)       | 6178   |
| 2449  | 14.9 | 6.8  | 0.9  | scaffold143.3_240,578-3,261,249 | 12613    | 13053    | (7619)   | C MER101B_CF   | LTR/ERV1          | (0)       | 467    |
| 1250  | 19.7 | 4.6  | 5.8  | scaffold143.3_240,578-3,261,249 | 13054    | 13245    | (7427)   | C L1MB8        | LINE/L1           | (164)     | 6014   |
| 259   | 32.2 | 9.1  | 2.9  | scaffold143.3_240,578-3,261,249 | 13246    | 13475    | (7107)   | + Cor-L_T5y    | Satellite         | (316)     | 2930   |
| 268   | 18.1 | 5.0  | 11.7 | scaffold143.3_240,578-3,261,249 | 13477    | 13576    | (7096)   | C L1M3         | LINE/L1           | (2430)    | 5565   |
| 1832  | 24.4 | 7.3  | 5.3  | scaffold143.3_240,578-3,261,249 | 13554    | 14007    | (6665)   | C L1M4         | LINE/L1           | (1485)    | 4661   |
| 1496  | 7.6  | 1.5  | 0.0  | scaffold143.3_240,578-3,261,249 | 14008    | 14205    | (6467)   | C SINEC1_Ame   | SINE/rRNA         | (0)       | 201    |
| 2408  | 22.1 | 3.4  | 4.7  | scaffold143.3_240,578-3,261,249 | 14206    | 14233    | (6439)   | C L1M4         | LINE/L1           | (1668)    | 4478   |
| 605   | 15.7 | 3.7  | 0.0  | scaffold143.3_240,578-3,261,249 | 14234    | 14341    | (6331)   | C SINEC_old    | SINE/rRNA         | (0)       | 112    |
| 2408  | 16.2 | 4.6  | 1.9  | scaffold143.3_240,578-3,261,249 | 14342    | 14967    | (5757)   | C L1M4         | LINE/L1           | (1841)    | 4594   |
| 1487  | 6.2  | 3.1  | 0.0  | scaffold143.3_240,578-3,261,249 | 14968    | 15162    | (5510)   | C SINEC1_Ame   | SINE/rRNA         | (0)       | 201    |
| 1965  | 20.0 | 5.1  | 9.5  | scaffold143.3_240,578-3,261,249 | 15163    | 15241    | (5431)   | C L1M4         | LINE/L1           | (2299)    | 3847   |
| 1496  | 7.5  | 1.0  | 1.0  | scaffold143.3_240,578-3,261,249 | 15242    | 15442    | (5230)   | C SINEC1_Ame   | SINE/rRNA         | (0)       | 201    |
| 1965  | 20.0 | 5.1  | 9.5  | scaffold143.3_240,578-3,261,249 | 15443    | 15601    | (5071)   | C L1M4         | LINE/L1           | (2368)    | 3778   |
| 1617  | 6.5  | 1.0  | 0.0  | scaffold143.3_240,578-3,261,249 | 15602    | 15800    | (4872)   | + SINEC1_Ame   | SINE/rRNA         | 1         | 201    |
| 1965  | 20.0 | 5.1  | 9.5  | scaffold143.3_240,578-3,261,249 | 15801    | 16016    | (4656)   | C L1M4         | LINE/L1           | (2521)    | 3625   |
| 4514  | 20.5 | 2.3  | 0.0  | scaffold143.3_240,578-3,261,249 | 16017    | 16928    | (3744)   | C LTR21B2_EC   | LTR/ERV1          | (0)       | 913    |
| 963   | 15.7 | 10.8 | 0.0  | scaffold143.3_240,578-3,261,249 | 16929    | 17151    | (3521)   | C L1M4         | LINE/L1           | (2740)    | 3406   |
| 307   | 18.3 | 4.0  | 4.0  | scaffold143.3_240,578-3,261,249 | 17315    | 17388    | (3284)   | C Charlie1b    | DNA/hAT-Charlie   | (19)      | 504    |
| 293   | 21.7 | 5.7  | 5.7  | scaffold143.3_240,578-3,261,249 | 18714    | 18801    | (1871)   | + MER70-int    | LTR/ERV1          | 4578      | 4665   |
| 479   | 29.2 | 4.1  | 0.7  | scaffold143.3_240,578-3,261,249 | 19106    | 19250    | (1422)   | + LTR75B       | LTR/ERV1          | 1         | 150    |
| 267   | 22.2 | 7.5  | 5.9  | scaffold143.3_240,578-3,261,249 | 19313    | 19379    | (1232)   | C LTR75B       | LTR/ERV1          | 262       | 229    |
| 218   | 32.1 | 3.7  | 0.0  | scaffold143.3_240,578-3,261,249 | 19572    | 19582    | (1080)   | C MIRb         | SINE/MIR          | 177       | 260    |
| 748   | 15.2 | 17.6 | 3.0  | scaffold143.3_240,578-3,261,249 | 19879    | 20054    | (618)    | C SINEC1_Ame   | SINE/rRNA         | (0)       | 201    |
| 18    | 17.9 | 0.0  | 0.0  | scaffold143.3_240,578-3,261,249 | 20206    | 20244    | (428)    | + (CT)n        | Simple_repeat     | 1         | 39     |
| 188   | 16.7 | 18.8 | 0.0  | scaffold143.3_240,578-3,261,249 | 20439    | 20486    | (186)    | C L2a          | LINE/L2           | (1)       | 3425   |
| 258   | 28.0 | 10.9 | 0.9  | scaffold143.3_240,578-3,261,249 | 20503    | 20603    | (69)     | + MER94        | DNA/hAT-Blackjack | 23        | 133    |
| 1980  | 17.5 | 5.6  | 0.0  | scaffold155.1_113,688-1,134,337 | 2        | 361      | (20209)  | C CorLTR2      | LTR/ERV1          | (198)     | 380    |
| 427   | 16.7 | 0.0  | 4.2  | scaffold155.1_113,688-1,134,337 | 362      | 436      | (20214)  | C MER68-int    | LTR/ERV1          | (2656)    | 334    |
| 515   | 25.8 | 2.7  | 2.1  | scaffold155.1_113,688-1,134,337 | 545      | 730      | (19920)  | C MER68-int    | LTR/ERV1          | (2795)    | 195    |
| 338   | 8.9  | 0.0  | 2.2  | scaffold155.1_113,688-1,134,337 | 777      | 822      | (19828)  | + LTR31_Ame    | LTR/ERV1          | 1         | 45     |
| 666   | 19.3 | 11.4 | 4.1  | scaffold155.1_113,688-1,134,337 | 823      | 1006     | (19644)  | + SINEC1_Ame   | SINE/rRNA         | 1         | 197    |
| 948   | 14.2 | 8.3  | 4.5  | scaffold155.1_113,688-1,134,337 | 1035     | 1226     | (19424)  | C SINEC1_Ame   | SINE/rRNA         | (2)       | 199    |
| 1608  | 6.0  | 0.0  | 1.0  | scaffold155.1_113,688-1,134,337 | 1211     | 1513     | (19137)  | + SINEC1_Ame   | SINE/rRNA         | 1         | 201    |
| 781   | 18.9 | 3.4  | 7.1  | scaffold155.1_113,688-1,134,337 | 1781     | 1985     | (18665)  | + SINEC1_Ame   | SINE/rRNA         | 2         | 199    |
| 918   | 12.9 | 12.5 | 3.0  | scaffold155.1_113,688-1,134,337 | 1989     | 2172     | (18478)  | + SINEC1_Ame   | SINE/rRNA         | 1         | 201    |
| 833   | 13.1 | 7.7  | 5.6  | scaffold155.1_113,688-1,134,337 | 2190     | 2383     | (18267)  | C SINEC1_Ame   | SINE/rRNA         | (3)       | 198    |
| 2685  | 9.6  | 0.7  | 3.2  | scaffold155.1_113,688-1,134,337 | 2390     | 2799     | (17851)  | C L1_Carn3     | LINE/L1           | (8)       | 6429   |
| 1116  | 32.5 | 2.9  | 1.8  | scaffold155.1_113,688-1,134,337 | 2992     | 3483     | (17167)  | + L1MED        | LINE/L1           | 416       | 912    |
| 572   | 21.4 | 4.3  | 8.5  | scaffold155.1_113,688-1,134,337 | 3484     | 3692     | (16958)  | + SINEC1_Ame   | SINE/rRNA         | 1         | 201    |
| 1575  | 7.0  | 0.0  | 0.0  | scaffold155.1_113,688-1,134,337 | 4153     | 4351     | (16299)  | + SINEC1_Ame   | SINE/rRNA         | 1         | 199    |
| 877   | 11.9 | 20.6 | 0.0  | scaffold155.1_113,688-1,134,337 | 4724     | 4883     | (15767)  | C SINEC_c1     | SINE/rRNA         | (16)      | 193    |
| 265   | 21.9 | 1.0  | 3.1  | scaffold155.1_113,688-1,134,337 | 4884     | 4973     | (15677)  | + L1MED        | LINE/L1           | 882       | 970    |
| 518   | 16.5 | 7.7  | 0.0  | scaffold155.1_113,688-1,134,337 | 4974     | 5064     | (15586)  | + SINEC_old    | SINE/rRNA         | 1         | 98     |
| 1365  | 13.1 | 0.0  | 0.0  | scaffold155.1_113,688-1,134,337 | 5074     | 5271     | (15379)  | + SINEC1_Ame   | SINE/rRNA         | 1         | 198    |
| 1049  | 12.5 | 5.9  | 3.0  | scaffold155.1_113,688-1,134,337 | 5281     | 5470     | (15180)  | + SINEC1_Ame   | SINE/rRNA         | 1         | 201    |
| 1037  | 19.9 | 4.4  | 1.1  | scaffold155.1_113,688-1,134,337 | 5495     | 5811     | (14593)  | + L1MED        | LINE/L1           | 947       | 1297   |
| 1851  | 21.8 | 1.8  | 9.0  | scaffold155.1_113,688-1,134,337 | 5812     | 5880     | (14770)  | C MLT1C        | LTR/ERV1-MaLR     | (0)       | 467    |
| 765   | 15.9 | 4.9  | 7.5  | scaffold155.1_113,688-1,134,337 | 5881     | 6084     | (14566)  | C SINEC1_Ame   | SINE/rRNA         | (2)       | 199    |
| 1851  | 21.8 | 1.8  | 9.0  | scaffold155.1_113,688-1,134,337 | 6085     | 6391     | (14259)  | C MLT1C        | LTR/ERV1-MaLR     | (59)      | 408    |
| 4214  | 7.7  | 0.8  | 3.1  | scaffold155.1_113,688-1,134,337 | 6392     | 6981     | (13669)  | C CorLTR1B1    | LTR/ERV1          | (0)       | 579    |
| 1851  | 18.8 | 1.8  | 0.0  | scaffold155.1_113,688-1,134,337 | 6982     | 7181     | (13547)  | C MLT1C        | LTR/ERV1-MaLR     | (361)     | 186    |
| 486   | 21.7 | 5.9  | 9.3  | scaffold155.1_113,688-1,134,337 | 7185     | 7172     | (13478)  | + L1MED        | LINE/L1           | 1257      | 1350   |
| 1563  | 7.5  | 0.0  | 0.0  | scaffold155.1_113,688-1,134,337 | 7173     | 7373     | (13277)  | + SINEC1_Ame   | SINE/rRNA         | 1         | 201    |
| 486   | 21.7 | 5.8  | 9.3  | scaffold155.1_113,688-1,134,337 | 7374     | 7527     | (13123)  | + L1MED        | LINE/L1           | 1316      | 1477   |
| 523   | 20.2 | 1.8  | 0.9  | scaffold155.1_113,688-1,134,337 | 7528     | 7637     | (13013)  | + SINEC_old    | SINE/rRNA         | 1         | 111    |
| 810   | 19.1 | 8.2  | 3.4  | scaffold155.1_113,688-1,134,337 | 7638     | 7832     | (12818)  | + SINEC_c1     | SINE/rRNA         | 6         | 209    |
| 748   | 5.0  | 3.2  | 4.8  | scaffold155.1_113,688-1,134,337 | 7782     | 7834     | (12816)  | + B2_5         | SINE/B4           | 164       | 216    |
| 961   | 14.9 | 6.7  | 2.5  | scaffold155.1_113,688-1,134,337 | 7835     | 8027     | (12623)  | + SINEC1_Ame   | SINE/rRNA         | 1         | 201    |
| 444   | 20.6 | 14.1 | 2.4  | scaffold155.1_113,688-1,134,337 | 8037     | 8185     | (12465)  | + L1MED        | LINE/L1           | 1450      | 1615   |
| 289   | 27.4 | 0.0  | 0.0  | scaffold155.1_113,688-1,134,337 | 8222     | 8294     | (12356)  | + MARNA        | DNA/TcMar-Mariner | 316       | 388    |
| 1531  | 4.7  | 4.2  | 0.0  | scaffold155.1_113,688-1,134,337 | 8337     | 8529     | (12121)  | C SINEC1_Ame   | SINE/rRNA         | (0)       | 201    |
| 302   | 18.8 | 12.5 | 0.0  | scaffold155.1_113,688-1,134,337 | 8567     | 8630     | (12020)  | + tRNA-Lys-AAG | tRNA              | 2         | 73     |
| 824   | 10.2 | 18.0 | 9.5  | scaffold155.1_113,688-1,134,337 | 8738     | 8943     | (11707)  | + SINEC1B_Ame  | SINE/rRNA         | 1         | 222    |
| 441   | 25.8 | 3.9  | 5.0  | scaffold155.1_113,688-1,134,337 | 8949     | 8991     | (11659)  | + L1MED        | LINE/L1           | 4990      | 5025   |
| 959   | 9.3  | 18.6 | 0.0  | scaffold155.1_113,688-1,134,337 | 8992     | 9152     | (11498)  | + SINEC_b1     | SINE/rRNA         | 2         | 192    |
| 441   | 25.8 | 3.9  | 5.0  | scaffold155.1_113,688-1,134,337 | 9153     | 9312     | (11338)  | + L1MED        | LINE/L1           | 5026      | 5190   |
| 825   | 6.8  | 0.0  | 15.7 | scaffold155.1_113,688-1,134,337 | 9296     | 9374     | (11276)  | + L1_Canid_    | LINE/L1           | 5254      | 5316   |
| 1003  | 11.3 | 0.0  | 0.8  | scaffold155.1_113,688-1,134,337 | 9375     | 9508     | (11142)  |                |                   |           |        |

759 23.5 9.5 1.8 scaffold155.1,113,688-1,134,337 16625 16826 (3824) + ERV54-EC\_I-int LTR/ERV1 3094 3303 (3960) 91

2648 11.1 1.3 0.2 scaffold155.1,113,688-1,134,337 17416 17804 (2846) + LTR31\_Ame LTR/ERV1 1 393 (131) 92

305 13.7 1.9 1.9 scaffold155.1,113,688-1,134,337 17804 17804 (2795) SINEC\_old SINE/ERNA (58) 54 3 93 \*

12 13.9 0.0 0.0 scaffold155.1,113,688-1,134,337 17856 17879 (2771) + (ACC)n Simple\_repeat 1 24 (0) 94

1367 18.8 5.0 1.4 scaffold155.1,113,688-1,134,337 17923 18263 (2387) + ERV54-EC\_I-int LTR/ERV1 3704 4056 (3207) 91

161 15.2 2.0 0.0 scaffold155.1,113,688-1,134,337 18289 18387 (2263) + SINEC\_old SINE/ERNA 9 109 (3) 95

351 23.8 0.0 5.0 scaffold155.1,113,688-1,134,337 18396 18501 (2149) + MER34-int LTR/ERV1 3187 3287 (2903) 86 \*

484 18.3 0.0 0.0 scaffold155.1,113,688-1,134,337 18408 18505 (2145) + ERV1-5N-EC\_I-int LTR/ERV1 2272 2357 (3254) 96

486 12.2 21.4 0.8 scaffold155.1,113,688-1,134,337 18508 18607 (2043) C SINEC\_b1 SINE/ERNA (125) 103 1 97

1592 23.5 9.7 10.1 scaffold155.1,113,688-1,134,337 18628 19792 (858) + MER34-int LTR/ERV1 4243 5403 (1860) 86

332 17.2 5.2 0.0 scaffold155.1,113,688-1,134,337 19808 19865 (785) + SINEC\_old SINE/ERNA 34 94 (18) 98

1103 19.0 9.9 6.8 scaffold155.1,113,688-1,134,337 19867 20090 (560) + MER34-int LTR/ERV1 5398 5638 (1625) 86

1633 7.5 0.0 0.0 scaffold155.1,113,688-1,134,337 20091 20291 (359) C SINEC1\_Ame SINE/ERNA (0) 201 1 99

1103 19.3 10.7 7.1 scaffold155.1,113,688-1,134,337 20292 20498 (152) + MER34-int LTR/ERV1 5639 5791 (1472) 86

241 27.9 3.6 9.2 scaffold155.1,113,688-1,134,337 20499 20636 (14) + HAL1-10\_Tbe1 LTR/ERV1 1785 1915 (615) 100

2352 6.4 0.0 0.0 scaffold162.1-18,384\_(reversed) 1 295 (18089) + LSU-rRNA\_Hsa rRNA 2420 2714 (2321) 101

313 15.9 8.8 10.0 scaffold162.1-18,384\_(reversed) 296 386 (17998) C ERV3-1\_S5c-LTR LTR/ERV1 (312) 137 48 102

1371 0.0 0.0 1.2 scaffold162.1-18,384\_(reversed) 387 558 (17826) + LSU-rRNA\_Hsa rRNA 2806 2975 (2060) 103

12353 3.9 1.2 0.8 scaffold162.1-18,384\_(reversed) 765 2291 (16093) + LSU-rRNA\_Hsa rRNA 3502 5035 (0) 103

38 4.7 0.0 0.0 scaffold162.1-18,384\_(reversed) 3012 3055 (15329) + (GTG)n Simple\_repeat 1 44 (0) 104

313 20.0 2.8 1.4 scaffold162.1-18,384\_(reversed) 3070 3140 (15244) C rRNA-Lys-AAG rRNA (3) 73 2 105

253 17.8 0.0 2.2 scaffold162.1-18,384\_(reversed) 3827 3872 (14512) C CorLTR2-int LTR/ERV1 (543) 4844 4800 106 \*

266 12.2 0.0 0.0 scaffold162.1-18,384\_(reversed) 3871 3911 (14473) C CorLTR1-int LTR/ERV1 (765) 4622 4582 106

69 6.9 1.7 4.3 scaffold162.1-18,384\_(reversed) 3923 4040 (14344) + (TCTT)n Simple\_repeat 1 115 (0) 107

492 18.0 3.0 1.0 scaffold162.1-18,384\_(reversed) 4041 4141 (14243) C CorLTR1-int LTR/ERV1 (2683) 3932 3830 106

612 9.9 0.0 0.0 scaffold162.1-18,384\_(reversed) 4143 4223 (14161) C L1\_Conid.L LINE/L1 (1120) 5331 5251 108

483 29.1 2.2 9.7 scaffold162.1-18,384\_(reversed) 4225 4580 (16193) C Sor-1\_T5y Satellite LINE/L1 (1186) 2130 1791 109

2686 22.4 2.9 3.4 scaffold162.1-18,384\_(reversed) 4646 4298 (13086) + ERV1-4N-EC\_I-int LTR/ERV1 5486 6135 (174) 110

672 10.6 1.1 0.0 scaffold162.1-18,384\_(reversed) 5381 5474 (12910) + SINEC\_old SINE/ERNA 1 95 (17) 111

503 22.5 3.7 4.0 scaffold162.1-18,384\_(reversed) 7462 7643 (10741) + LTRIS4 LTR/ERV1 309 465 (42) 112

713 31.9 0.7 1.7 scaffold162.1-18,384\_(reversed) 8196 8485 (9899) + KORV\_I-int LTR/ERV1 457 743 (6681) 113

2610 27.4 3.9 2.8 scaffold162.1-18,384\_(reversed) 8736 10001 (8383) + KORV\_I-int LTR/ERV1 1024 2334 (5090) 113

12163 31.2 5.3 6.8 scaffold162.1-18,384\_(reversed) 11487 13001 (5338) + KORV\_I-int LTR/ERV1 4189 5682 (1742) 113

360 35.2 0.0 0.0 scaffold162.1-18,384\_(reversed) 13060 13201 (5183) + KORV\_I-int LTR/ERV1 5813 5954 (1470) 113

291 28.4 0.0 0.0 scaffold162.1-18,384\_(reversed) 13240 13313 (5071) + KORV\_I-int LTR/ERV1 6023 6096 (1328) 113

891 33.4 3.0 2.6 scaffold162.1-18,384\_(reversed) 13361 13821 (4563) + KORV\_I-int LTR/ERV1 6962 7424 (0) 113

503 22.3 4.7 3.4 scaffold162.1-18,384\_(reversed) 14243 14448 (3936) + LTRIS4 LTR/ERV1 205 465 (42) 114

1001 9.7 5.8 0.0 scaffold162.1-18,384\_(reversed) 14887 15144 (3240) C L1-1\_Ame LINE/L1 (4) 6843 6571 115

1233 29.7 6.2 2.7 scaffold182.1,642,082-1,661,437 5142 5156 (18200) + L1MS LINE/L1 4413 5182 (964) 116

295 30.7 8.9 2.7 scaffold182.1,642,082-1,661,437 1138 1445 (17911) L1MS LINE/L1 5254 5516 (607) 116

289 17.7 3.2 1.6 scaffold182.1,642,082-1,661,437 1461 1523 (17833) + L1MS LINE/L1 5573 5636 (487) 116

1242 18.8 4.4 1.9 scaffold182.1,642,082-1,661,437 1583 1856 (17500) + LTR22\_FC LTR/ERV1 229 489 (0) 117

287 25.1 14.4 1.8 scaffold182.1,642,082-1,661,437 1867 2012 (17344) + L1ME3E LINE/L1 5780 5943 (299) 118

421 32.8 5.0 4.7 scaffold182.1,642,082-1,661,437 2232 2589 (16767) + ERVL-E-int LTR/ERVL 2725 3083 (2584) 119

1114 30.3 5.9 2.8 scaffold182.1,642,082-1,661,437 2759 3253 (16183) + ERVL-E-int LTR/ERVL 3307 3816 (1815) 119

273 31.5 1.6 4.9 scaffold182.1,642,082-1,661,437 3452 5578 (15757) + ERVL-E-int LTR/ERVL 4169 4291 (1470) 119

20 26.5 3.5 5.4 scaffold182.1,642,082-1,661,437 3631 3744 (15612) + A-rich Low\_complexity 1 112 (0) 120

266 8.3 10.4 0.0 scaffold182.1,642,082-1,661,437 4050 4097 (15259) C MLT281 LTR/ERVL (3) 564 512 121

234 28.1 1.8 0.0 scaffold182.1,642,082-1,661,437 4138 4194 (15162) C HAL1-3A\_ME LINE/L1 (835) 2023 1966 122

530 12.3 0.0 0.0 scaffold182.1,642,082-1,661,437 4457 4537 (14819) C L1\_Carn5 LINE/L1 (8) 6501 6421 123

11 24.3 0.0 0.0 scaffold182.1,642,082-1,661,437 4546 4579 (14717) + TTTTAT)n Simple\_repeat 1 34 (0) 124

383 25.7 0.2 9.9 scaffold182.1,642,082-1,661,437 4589 4696 (14660) + MLT3 LTR/ERVL-MLR 1 509 (440) 125

1174 14.0 0.0 5.5 scaffold182.1,642,082-1,661,437 5380 5591 (13765) C SINEC1\_Ame SINE/ERNA (0) 201 1 126

1550 20.0 0.3 8.0 scaffold182.1,642,082-1,661,437 5596 6003 (13353) C L1MB3\_EC LINE/L1 (624) 5590 5220 127

1479 24.2 2.7 2.7 scaffold182.1,642,082-1,661,437 6004 6445 (12911) + L1ME1 LINE/L1 5505 5946 (233) 128

366 27.0 2.7 0.0 scaffold182.1,642,082-1,661,437 6475 6585 (12771) + L1ME1 LINE/L1 6044 6157 (22) 128

16 13.7 2.9 2.9 scaffold182.1,642,082-1,661,437 7203 7236 (12120) + (CTA)n Simple\_repeat 1 34 (0) 129

481 21.1 3.9 2.2 scaffold182.1,642,082-1,661,437 9787 9972 (9384) + LTRIS4 LTR/ERV1 144 462 (45) 130

299 24.7 9.4 0.6 scaffold182.1,642,082-1,661,437 9996 10147 (9209) C MIR\_Mars SINE/MIR (13) 261 96 131

608 21.1 0.8 0.0 scaffold182.1,642,082-1,661,437 10637 10764 (8592) + L1-1\_Ame LINE/L1 6700 6828 (19) 132

1366 8.6 0.5 0.0 scaffold182.1,642,082-1,661,437 10771 10957 (8399) + SINEC1\_Ame SINE/ERNA 1 188 (13) 133

47 0.0 0.0 0.0 scaffold182.1,642,082-1,661,437 10961 11003 (8353) + (AAAT)n Simple\_repeat 1 43 (0) 134

234 19.5 0.0 6.0 scaffold182.1,642,082-1,661,437 11062 11322 (8224) + LTR1A2\_ML LTR/ERV1 510 576 (191) 135

326 31.4 8.8 1.4 scaffold182.1,642,082-1,661,437 11452 11793 (7363) + L1ME3F LINE/L1 4303 4669 (1477) 136

544 23.7 2.5 8.8 scaffold182.1,642,082-1,661,437 12150 12390 (6966) C SINEC1B\_Ame SINE/ERNA (0) 228 2 137

265 26.2 3.9 3.4 scaffold182.1,642,082-1,661,437 12565 12742 (6614) + L1ME3F LINE/L1 5264 5442 (801) 136 \*

293 27.0 1.2 2.4 scaffold182.1,642,082-1,661,437 12629 12771 (6585) + L1P5 LINE/L1 5329 5453 (701) 138 \*

1147 24.8 9.6 2.4 scaffold182.1,642,082-1,661,437 12770 13206 (6150) + L1ME3F LINE/L1 5494 5961 (282) 136

564 22.9 3.4 0.0 scaffold182.1,642,082-1,661,437 14452 14569 (6177) + SINEC2\_Ame SINE/ERNA 1 122 (11) 139

338 8.7 14.5 0.0 scaffold182.1,642,082-1,661,437 14574 14642 (4714) + SINEC\_c2 SINE/ERNA 132 210 (2) 140

16 21.6 2.3 0.0 scaffold182.1,642,082-1,661,437 14714 14756 (4600) + A-rich Low\_complexity 1 44 (0) 141

243 36.5 3.3 2.2 scaffold182.1,642,082-1,661,437 15286 15467 (3889) + L2-2\_ME LINE/L2 1655 1838 (703) 142

23 24.5 1.4 1.4 scaffold182.1,642,082-1,661,437 16631 16700 (2656) + GA-rich Low\_complexity 1 70 (0) 143

694 20.8 1.3 0.7 scaffold182.1,642,082-1,661,437 17549 17698 (1658) C L1\_Conid.L LINE/L1 (0) 6451 6301 144

533 23.2 6.3 9.6 scaffold182.1,642,082-1,661,437 18645 18849 (609) + SINEC1\_Ame SINE/ERNA 1 199 (2) 145

24 19.8 1.3 3.0 scaffold182.1,642,082-1,661,437 19197 19264 (392) C (ATAGAT)n Simple\_repeat 1 66 (0) 146

1553 7.1 0.5 0.0 scaffold1\_66,687,907-66,667,100\_(reversed) 67 262 (20546) + SINEC1\_Ame SINE/ERNA 1 197 (4) 147

592 29.5 1.7 7.5 scaffold1\_66,687,907-66,667,100\_(reversed) 1100 1188 (19620) + L1MC1 LINE/L1 4142 4529 (1905) 148

1784 18.4 0.0 0.6 scaffold1\_66,687,907-66,667,100\_(reversed) 1189 1506 (19302) + L1MC LINE/L1 3984 4299 (1847) 149

812 12.3 28.4 0.0 scaffold1\_66,687,907-66,667,100\_(reversed) 1507 1661 (19147) + SINEC\_c1 SINE/ERNA 1 199 (10) 150

592 29.5 1.7 7.5 scaffold1\_66,687,907-66,667,100\_(reversed) 1662 1675 (19133) + L1MC LINE/L1 4530 4540 (1894) 149

3465 22.0 4.2 4.5 scaffold1\_66,687,907-66,667,100\_(reversed) 1688 1859 (17949) + L1MC1 LINE/L1 4288 6277 (723) 148 \*

425 15.6 0.9 2.5 scaffold1\_66,687,907-66,667,100\_(reversed) 2075 2826 (17949) + L1MC1\_EC LINE/L1 4674 5448 (889) 151

823 13.5 0.8 0.0 scaffold1\_66,687,907-66,667,100\_(reversed) 2869 2994 (17814) + SINEC\_b1 SINE/ERNA 1 127 (67) 152

29 0.0 0.0 0.0 scaffold1\_66,687,907-66,667,100\_(reversed) 2995 3019 (17789) + (TC)n Simple\_repeat 1 25 (0) 153

4560 18.5 3.9 0.0 scaffold1\_66,687,907-66,667,100\_(reversed) 3056 3932 (16876) + L1MC1 LINE/L1 5423 6333 (0) 148

433 30.9 2.1 4.9 scaffold1\_66,687,907-66,667,100\_(reversed) 4808 5832 (15776) C MonGyLTR3 LTR/Gypsy (18) 963 711 154

269 33.7 2.4 0.0 scaffold1\_66,687,907-66,667,100\_(reversed) 5347 5512 (15296) C MonGyLTR3 LTR/Gypsy (609) 285 66 154

531 27.7 10.8 0.9 scaffold1\_66,687,907-66,667,100\_(reversed) 5842 5943 (14865) C MIR3\_Mars8 SINE/MIR (71) 144 33 155

213 21.7 4.7 3.4 scaffold1\_66,687,907-66,667,100\_(reversed) 6386 6591 (14217) + LTRIS4 LTR/ERV1 205 465 (42) 156

253 28.4 0.0 1.1 scaffold1\_66,687,907-66,667,100\_(reversed) 6842 6930 (13878) + KORV\_I-int LTR/ERV1 198 285 (7297) 157

13 20.6 2.4 2.4 scaffold1\_66,687,907-66,667,100\_(reversed) 7071 7111 (13697) + TGTTT)n Simple\_repeat 1 41 (0) 158

754 30.9 0.7 1.7 scaffold1\_66,687,907-66,667,100\_(reversed) 7143 7432 (13376) + KORV\_I-int LTR/ERV1 457 743 (6681) 157

6139 29.3 2.8 2.5 scaffold1\_66,687,907-66,667,100\_(reversed) 7683 10804 (10004) + KORV\_I-int LTR/ERV1 1024 4183 (320) 157

269 33.7 2.4 0.0 scaffold1\_66,687,907-66,667,100\_(reversed) 12340 12505 (8303) C MonGyLTR3 LTR/Gypsy (609) 285 66 159

231 27.7 10.8 0.9 scaffold1\_66,687,907-66,667,100\_(reversed) 12835 12936 (7872) C MIR3\_Mars8 SINE/MIR (71) 144 33 160

513 21.7 4.7 3.4 scaffold1\_66,687,907-66,667,100\_(reversed) 13379 13584 (7224) + LTRIS4 LTR/ERV1 205 465 (42) 161

238 26.9 1.0 5.3 scaffold1\_66,687,907-66,667,100\_(reversed) 13628 13725 (7083) C Mon1f4 SINE/MIR (120) 147 54 162

220 29.4 2.6 3.9 scaffold1\_66,687,907-66,667,100\_(reversed) 14406 14483 (6325) C MIR0 SINE/MIR (26) 242 166 163

234 31.2 1.1 0.0 scaffold1\_66,687,907-66,667,100\_(reversed) 14860 14955 (5853) + MIR3 SINE/MIR 111 208 (0) 164

32 23.4 0.0 0.0 scaffold1\_66,687,907-66,667,100\_(reversed) 16909 16978 (3830) + A-rich Low\_complexity 1 70 (0) 165

31 19.6 4.8 1.2 scaffold1\_66,687,907-66,667,100\_(reversed) 17536 17618 (3190) + (AT)n Simple\_repeat 1 86 (0) 166

217 27.7 14.7 0.6 scaffold1\_66,687,907-66,667,100\_(reversed) 17665 17820 (2988) C MIRc SINE/MIR (27) 241 64 167

485 24.5 0.0 0.9 scaffold1\_66,687,907-66,667,100\_(reversed) 17910 18020 (2789) + ORSL DNA/HAT-Tip100 1 110 (165) 168 \*

607 14.5 10.3 2.9 scaffold1\_66,687,907-66,667,100\_(reversed) 18015 18146 (2662) + SINEC\_c2 SINE/ERNA 75 219 (0) 169

23 22.7 2.7 2.7 scaffold1\_66,687,907-66,667,100\_(reversed) 18216 18288 (2520) + G-rich Low\_complexity 1 73 (0) 170

271 27.5 0.0 0.0 scaffold1\_66,687,907-66,667,100\_(reversed) 18340 18408 (2400) + L2c LINE/L2 3091 3159 (228) 171

1634 20.4 5.8 1.2 scaffold1\_66,687,907-66,667,100\_(reversed) 19129 19271 (1537) C L1MA9 LINE/L1 (0) 6312 6167 172

36 0.0 0.0 0.0 scaffold1\_66,687,907-66,667,100\_(reversed) 19272 19302 (1506) + (GT)n Simple\_repeat 1 31 (0) 173

1634 20.4 5.8 1.2 scaffold1\_66,687,907-66,667,100\_(reversed) 19303 19540 (1268) C L1MA9 LINE/L1 (146) 6166 5915 172

25 10.0 2.3 0.0 scaffold1\_66,687,907-66,667,100\_(reversed) 20157 20199 (609) + TTTTGT)n Simple\_repeat 1 44 (0) 174

55 1.7 3.3 0.0 scaffold1\_66,687,907-66,667,100\_(reversed) 20513 20573 (235) C TTTAT)n Simple\_repeat 1 63 (0) 175

264 16.3 2.6 3.4 scaffold1200.144,464-153,663 6 79 (9121) + L1\_Mur2 LINE/L1 2903 2958 (2919) 176

159 29.6 10.2 3.2 scaffold200.144,464-153,663 120 590 (8610) + ERVL-E-int LTR/ERVL 1262 1790 (3924) 177

503 22.3 4.7 3.4 scaffold200.144,464-153,663 1021 1226 (7974) + LTRIS4 LTR/ERV1 205 465 (42) 178

743 31.2 0.7 1.7 scaffold200.144,464-153,663 1378 1667 (7533) + KORV\_I-int LTR/ERV1 457 743 (6681) 179

6735 29.6 3.1 3.4 scaffold200.144,464-153,663 1918 6560 (2640) + KORV\_I-int LTR/ERV1 1024 5682 (1742) 179

240 35.0 0.0 0.0 scaffold200.144,464-153,663 6658 6760 (2440) + KORV\_I-int LTR/ERV1 5958 5852 5954 (1470) 179

276 22.6 0.0 0.0 scaffold200.144,464-153,663 6820 6872 (2328) + KORV\_I-int LTR/ERV1 6044 6096 (1328) 179

383 36.2 2.5 2.1 scaffold200.144,464-153,663 7056 7292 (1908) + KORV\_I-int LTR/ERV1 6300 6537 (887) 179

1293 33.3 3.6 4.2 scaffold200.144,464-153,663 7412 8217 (983) + KORV\_I-int LTR/ERV1 6624 7424 (0) 179

476 22.4 6.5 2.3 scaffold200.144,464-153,663 8654 8833 (367) + LTRIS4 LTR/ERV1 205 465 (42) 180

|      |      |      |      |                                 |       |       |                         |                    |        |      |        |       |     |
|------|------|------|------|---------------------------------|-------|-------|-------------------------|--------------------|--------|------|--------|-------|-----|
| 341  | 30.6 | 13.4 | 1.2  | scaffold200_144,464-153,663     | 8956  | 9104  | (96) + MER3A            | DNA/HAT-Blackjack  | 7      | 173  | (37)   | 181   |     |
| 31   | 2.5  | 2.4  | 2.4  | scaffold200_144,464-153,663     | 9137  | 9178  | (22) + (TCCT)n          | Simple_repeat      |        |      |        |       |     |
| 1687 | 11.0 | 2.5  | 0.0  | scaffold211.1,354,903-1,360,362 | 235   | 470   | (4900) + CorLTR1-int    | LTR/ERV1           | 1310   | 1560 | (5655) | 183   |     |
| 311  | 9.8  | 0.0  | 0.0  | scaffold211.1,354,903-1,360,362 | 473   | 513   | (4947) + ERV5A-EC_I-int | LTR/ERV1           | 4000   | 4040 | (3223) | 184 * |     |
| 726  | 7.5  | 33.3 | 1.1  | scaffold211.1,354,903-1,360,362 | 497   | 688   | (4772) + CorLTR1-int    | LTR/ERV1           | 1993   | 2248 | (4367) | 183   |     |
| 581  | 6.7  | 0.0  | 0.0  | scaffold211.1,354,903-1,360,362 | 688   | 762   | (4698) + HUERS-P3-int   | LTR/ERV1           | 2007   | 2081 | (4534) | 185 * |     |
| 1855 | 33.5 | 4.4  | 2.5  | scaffold211.1,354,903-1,360,362 | 915   | 1953  | (3507) + HUERS-P3-int   | LTR/ERV1           | 2634   | 3691 | (5228) | 185   |     |
| 374  | 32.9 | 8.2  | 2.9  | scaffold211.1,354,903-1,360,362 | 1954  | 2247  | (3213) + HUERS-P3-int   | LTR/ERV1           | 2746   | 3054 | (4370) | 186   |     |
| 755  | 34.3 | 0.4  | 0.0  | scaffold211.1,354,903-1,360,362 | 2251  | 2515  | (2945) + HUERS-P3-int   | LTR/ERV1           | 3977   | 4242 | (2849) | 186   |     |
| 3401 | 32.2 | 2.8  | 1.7  | scaffold211.1,354,903-1,360,362 | 2530  | 3910  | (1550) + HUERS-P3-int   | LTR/ERV1           | 4367   | 5762 | (3157) | 186   |     |
| 481  | 33.9 | 5.6  | 3.4  | scaffold211.1,354,903-1,360,362 | 3916  | 4288  | (1172) + KORV_I-int     | LTR/ERV1           | 4741   | 5121 | (2303) | 187   |     |
| 375  | 30.0 | 2.4  | 2.4  | scaffold211.1,354,903-1,360,362 | 4405  | 4568  | (892) + HUERS-P3-int    | LTR/ERV1           | 6652   | 6815 | (1811) | 186   |     |
| 679  | 27.2 | 4.6  | 4.6  | scaffold211.1,354,903-1,360,362 | 4673  | 4888  | (572) + LTR77-int_TS    | LTR/ERV1           | 5336   | 5551 | (0)    | 188   |     |
| 1071 | 20.4 | 2.9  | 7.1  | scaffold211.1,354,903-1,360,362 | 5009  | 5287  | (173) + CorLTR9         | LTR/ERV1           | 296    | 563  | (0)    | 189   |     |
| 641  | 23.7 | 3.5  | 0.0  | scaffold211.1,354,903-1,360,362 | 5288  | 5460  | (0) + L1MBB_EC          | LINE/L1            | (186)  | 6788 | 6610   | 190   |     |
| 784  | 19.0 | 7.1  | 2.1  | scaffold217_224,999-245,612     | 1     | 183   | (204313) + SINEC_c2     | SINE/rRNA          | 21     | 212  | (0)    | 191   |     |
| 723  | 17.1 | 10.6 | 3.5  | scaffold217_224,999-245,612     | 214   | 401   | (20213) + SINEC1_Ame    | SINE/rRNA          | (0)    | 201  | 1      | 192   |     |
| 17   | 29.7 | 0.0  | 0.0  | scaffold217_224,999-245,612     | 2257  | 2305  | (18309) + (AC)n         | Simple_repeat      | 1      | 49   | (0)    | 193   |     |
| 1008 | 8.8  | 16.7 | 8.4  | scaffold217_224,999-245,612     | 2325  | 2534  | (18080) + SINEC1B_Ame   | SINE/rRNA          | 1      | 226  | (2)    | 194   |     |
| 225  | 11.8 | 0.0  | 0.0  | scaffold217_224,999-245,612     | 2659  | 2692  | (17922) + CORRIAS-int   | LTR/ERV1-MaLR      | (11)   | 1952 | 1919   | 195   |     |
| 189  | 29.2 | 5.6  | 1.1  | scaffold217_224,999-245,612     | 2804  | 2893  | (17721) + MIR           | SINE/MIR           | 166    | 259  | (3)    | 196   |     |
| 40   | 0.0  | 0.0  | 0.0  | scaffold217_224,999-245,612     | 3324  | 3357  | (17257) + (CA)n         | Simple_repeat      | 1      | 34   | (0)    | 197   |     |
| 222  | 23.1 | 18.2 | 0.0  | scaffold217_224,999-245,612     | 4112  | 4254  | (16360) + C MIR         | SINE/MIR           | (53)   | 215  | 40     | 198   |     |
| 269  | 27.1 | 1.0  | 2.1  | scaffold217_224,999-245,612     | 4350  | 4447  | (16167) + C WALLS14     | SINE/rRNA-Core-RTE | (108)  | 141  | 45     | 199 * |     |
| 281  | 26.9 | 4.0  | 4.1  | scaffold217_224,999-245,612     | 4360  | 4460  | (16154) + C MonIg3      | SINE/MIR           | (153)  | 134  | 38     | 200   |     |
| 196  | 26.1 | 0.0  | 7.8  | scaffold217_224,999-245,612     | 5340  | 5422  | (15192) + L2d           | LINE/L2            | 3018   | 3094 | (370)  | 201   |     |
| 21   | 18.4 | 0.0  | 9.0  | scaffold217_224,999-245,612     | 7660  | 7732  | (12882) + (CTCTAGAA)n   | Simple_repeat      | 1      | 67   | (0)    | 202   |     |
| 283  | 27.4 | 2.4  | 1.2  | scaffold217_224,999-245,612     | 7989  | 8073  | (12543) + C MIRb        | SINE/MIR           | (68)   | 200  | 115    | 203   |     |
| 315  | 29.4 | 6.5  | 0.9  | scaffold217_224,999-245,612     | 9252  | 9450  | (11164) + MIR           | SINE/MIR           | 12     | 221  | (41)   | 204   |     |
| 367  | 26.3 | 2.1  | 9.0  | scaffold217_224,999-245,612     | 9728  | 9869  | (10745) + C PlatSat2A   | Satellite          | (642)  | 391  | 259    | 205   |     |
| 502  | 21.9 | 14.6 | 3.8  | scaffold217_224,999-245,612     | 10045 | 10221 | (10393) + C LTRIS4      | LTR/ERV1           | (39)   | 468  | 309    | 206   |     |
| 199  | 26.1 | 0.0  | 0.0  | scaffold217_224,999-245,612     | 10726 | 10771 | (9843) + C MIR3         | SINE/MIR           | (61)   | 147  | 102    | 207   |     |
| 28   | 21.0 | 1.6  | 0.0  | scaffold217_224,999-245,612     | 11496 | 11556 | (9865) + (CT)n          | Simple_repeat      | 1      | 62   | (0)    | 208   |     |
| 15   | 15.5 | 2.8  | 0.0  | scaffold217_224,999-245,612     | 11623 | 11658 | (8956) + (CTCTCTC)n     | Simple_repeat      | 1      | 37   | (0)    | 209   |     |
| 15   | 13.2 | 4.4  | 4.4  | scaffold217_224,999-245,612     | 11823 | 11867 | (8747) + (TCCTCAC)n     | Simple_repeat      | 1      | 45   | (0)    | 210   |     |
| 348  | 27.9 | 7.2  | 4.4  | scaffold217_224,999-245,612     | 13194 | 13635 | (6979) + L2b            | LINE/L2            | 2921   | 3374 | (1)    | 211   |     |
| 255  | 22.9 | 0.0  | 1.4  | scaffold217_224,999-245,612     | 14017 | 14087 | (6527) + MSR1           | Satellite          | 10     | 79   | (32)   | 212   |     |
| 36   | 17.5 | 0.0  | 1.4  | scaffold217_224,999-245,612     | 14332 | 14405 | (6209) + G-rich         | Low_complexity     | 1      | 73   | (0)    | 213   |     |
| 325  | 27.9 | 4.2  | 1.0  | scaffold217_224,999-245,612     | 14572 | 14761 | (5830) + L1             | LINE/L1            | 5476   | 5859 | (335)  | 214   |     |
| 443  | 19.8 | 3.8  | 4.8  | scaffold217_224,999-245,612     | 14913 | 15018 | (55967) + C MER77       | LTR/ERV1           | (0)    | 604  | 580    | 215   |     |
| 1399 | 24.0 | 5.9  | 4.6  | scaffold217_224,999-245,612     | 15039 | 15462 | (5152) + C MER77        | LTR/ERV1           | (72)   | 532  | 105    | 215   |     |
| 259  | 15.4 | 0.0  | 0.0  | scaffold217_224,999-245,612     | 15484 | 15522 | (5092) + C L2B_ME       | LINE/L2            | (18)   | 3429 | 3391   | 216   |     |
| 13   | 4.7  | 0.0  | 4.3  | scaffold217_224,999-245,612     | 15705 | 15728 | (4886) + (GAGC)n        | Simple_repeat      | 1      | 23   | (0)    | 217   |     |
| 606  | 31.6 | 7.4  | 0.9  | scaffold217_224,999-245,612     | 15800 | 16421 | (4193) + L1M5           | LINE/L1            | 5254   | 5703 | (491)  | 218   |     |
| 1424 | 12.0 | 0.5  | 0.0  | scaffold217_224,999-245,612     | 16565 | 16764 | (3850) + SINEC1_Ame     | SINE/rRNA          | 1      | 201  | (0)    | 219   |     |
| 13   | 27.7 | 4.9  | 0.0  | scaffold217_224,999-245,612     | 17301 | 17361 | (3253) + (CTCTGT)n      | Simple_repeat      | 1      | 64   | (0)    | 220   |     |
| 1386 | 18.6 | 7.9  | 4.3  | scaffold217_224,999-245,612     | 17616 | 18020 | (2594) + C L1MC         | LINE/L1            | (1117) | 5029 | 4611   | 221   |     |
| 2237 | 17.4 | 2.7  | 2.3  | scaffold217_224,999-245,612     | 18099 | 18459 | (2155) + C L1MC         | LINE/L1            | (1489) | 4657 | 4291   | 221   |     |
| 2268 | 16.0 | 4.5  | 3.1  | scaffold217_224,999-245,612     | 18460 | 18905 | (1709) + CorERV4o_LTR   | LTR/ERV1           | 5      | 456  | (0)    | 222   |     |
| 2237 | 17.4 | 2.7  | 2.3  | scaffold217_224,999-245,612     | 18906 | 19018 | (1596) + C L1MC         | LINE/L1            | (1856) | 4290 | 4181   | 221   |     |
| 1580 | 7.0  | 0.0  | 1.0  | scaffold217_224,999-245,612     | 19024 | 19226 | (1388) + SINEC1_Ame     | SINE/rRNA          | (0)    | 201  | (0)    | 223   |     |
| 727  | 23.0 | 2.1  | 8.7  | scaffold217_224,999-245,612     | 19231 | 19463 | (1151) + C L1MCL_EC     | LINE/L1            | (2144) | 4201 | 3983   | 224   |     |
| 300  | 30.4 | 8.4  | 3.3  | scaffold217_224,999-245,612     | 19470 | 19612 | (1002) + C LTR40a       | LTR/ERV1           | (219)  | 300  | 151    | 225   |     |
| 989  | 12.8 | 6.4  | 7.0  | scaffold217_224,999-245,612     | 20102 | 20303 | (311) + SINEC1_Ame      | SINE/rRNA          | 1      | 201  | (0)    | 226   |     |
| 218  | 25.3 | 11.4 | 0.0  | scaffold30_5,823,614-5,844,139  | 348   | 426   | (20100) + C L2d         | LINE/L2            | (86)   | 3339 | 3252   | 227   |     |
| 424  | 28.1 | 7.1  | 6.7  | scaffold30_5,823,614-5,844,139  | 747   | 998   | (19528) + C MonRep605   | LTR?               | 210    | 462  | (387)  | 228   |     |
| 773  | 25.9 | 1.6  | 3.2  | scaffold30_5,823,614-5,844,139  | 1130  | 1384  | (19142) + C MIR         | SINE/MIR           | (18)   | 201  | 252    | 229   |     |
| 325  | 23.9 | 2.0  | 0.0  | scaffold30_5,823,614-5,844,139  | 1863  | 1962  | (18564) + L1_Conid_     | LINE/L1            | 6364   | 6451 | (0)    | 230   |     |
| 297  | 31.5 | 8.1  | 10.3 | scaffold30_5,823,614-5,844,139  | 3135  | 3481  | (17045) + L1M6          | LINE/L1            | 682    | 1021 | (5475) | 231   |     |
| 404  | 30.6 | 9.8  | 0.4  | scaffold30_5,823,614-5,844,139  | 3648  | 3893  | (16633) + L1M6          | LINE/L1            | 1251   | 1519 | (4977) | 231   |     |
| 244  | 24.4 | 0.0  | 1.9  | scaffold30_5,823,614-5,844,139  | 4133  | 4222  | (16304) + L1M6          | LINE/L1            | 1813   | 1988 | (688)  | 231   |     |
| 1061 | 8.7  | 2.0  | 0.0  | scaffold30_5,823,614-5,844,139  | 4770  | 4918  | (15608) + L1_Corn3      | LINE/L1            | 6285   | 6436 | (1)    | 232   |     |
| 49   | 13.7 | 2.5  | 0.0  | scaffold30_5,823,614-5,844,139  | 4935  | 4974  | (15552) + A-rich        | Low_complexity     | 1      | 41   | (0)    | 233   |     |
| 361  | 23.5 | 16.9 | 3.6  | scaffold30_5,823,614-5,844,139  | 5941  | 6212  | (15314) + C SINEC1_Ame  | SINE/rRNA          | (7)    | 194  | 1      | 234   |     |
| 1606 | 5.5  | 1.0  | 0.0  | scaffold30_5,823,614-5,844,139  | 5427  | 5625  | (14901) + C SINEC1_Ame  | SINE/rRNA          | (0)    | 201  | 1      | 235   |     |
| 24   | 20.9 | 0.0  | 0.0  | scaffold30_5,823,614-5,844,139  | 5850  | 5904  | (14622) + (AATC)n       | Simple_repeat      | 1      | 55   | (0)    | 236   |     |
| 12   | 20.2 | 2.9  | 0.0  | scaffold30_5,823,614-5,844,139  | 6136  | 6169  | (14357) + (ATATA)n      | Simple_repeat      | 1      | 35   | (0)    | 237   |     |
| 488  | 25.8 | 0.8  | 0.0  | scaffold30_5,823,614-5,844,139  | 6220  | 6339  | (14187) + SINEC2_Ame    | SINE/rRNA          | 4      | 124  | (9)    | 238   |     |
| 356  | 13.9 | 15.1 | 1.0  | scaffold30_5,823,614-5,844,139  | 6340  | 6425  | (14101) + SINEC_Fc3     | SINE/rRNA          | 642    | 6418 | 226    | (1)   | 239 |
| 387  | 33.9 | 1.6  | 0.0  | scaffold30_5,823,614-5,844,139  | 7383  | 7509  | (13017) + MIRb          | SINE/MIR           | 44     | 172  | (96)   | 240   |     |
| 565  | 20.3 | 0.8  | 0.0  | scaffold30_5,823,614-5,844,139  | 8747  | 8869  | (11657) + SINEC2_Ame    | SINE/rRNA          | 1      | 124  | (9)    | 241   |     |
| 242  | 19.5 | 6.4  | 1.2  | scaffold30_5,823,614-5,844,139  | 8871  | 8948  | (11578) + SINEC_c1      | SINE/rRNA          | 126    | 207  | (2)    | 242   |     |
| 303  | 36.0 | 7.5  | 1.9  | scaffold30_5,823,614-5,844,139  | 9735  | 9989  | (10537) + C L2c         | LINE/L2            | (85)   | 3302 | 3034   | 243   |     |
| 513  | 22.1 | 4.1  | 4.0  | scaffold30_5,823,614-5,844,139  | 10010 | 10215 | (10311) + C LTRIS4      | LTR/ERV1           | (42)   | 465  | 205    | 244   |     |
| 378  | 18.5 | 18.4 | 0.8  | scaffold30_5,823,614-5,844,139  | 10678 | 10806 | (9720) + MER68          | DNA/HAT-Tip100     | 49     | 176  | (241)  | 245   |     |
| 53   | 1.9  | 0.0  | 0.0  | scaffold30_5,823,614-5,844,139  | 10934 | 11045 | (9483) + (CTA)n         | Simple_repeat      | 1      | 52   | (0)    | 246   |     |
| 489  | 14.6 | 7.7  | 2.3  | scaffold30_5,823,614-5,844,139  | 11095 | 11257 | (9269) + SINEC_a2       | SINE/rRNA          | 1      | 179  | (0)    | 247   |     |
| 12   | 8.9  | 4.2  | 0.0  | scaffold30_5,823,614-5,844,139  | 11269 | 11292 | (9234) + (TTTA)n        | Simple_repeat      | 1      | 25   | (0)    | 248   |     |
| 658  | 16.5 | 26.7 | 2.0  | scaffold30_5,823,614-5,844,139  | 11297 | 11457 | (9069) + C SINEC_c1     | SINE/rRNA          | (9)    | 200  | 1      | 249   |     |
| 240  | 30.3 | 9.0  | 9.0  | scaffold30_5,823,614-5,844,139  | 11545 | 11722 | (8804) + MIRc           | SINE/MIR           | 51     | 231  | (37)   | 250   |     |
| 782  | 18.5 | 11.9 | 3.5  | scaffold30_5,823,614-5,844,139  | 12219 | 12403 | (8123) + SINEC1_Ame     | SINE/rRNA          | 2      | 203  | (0)    | 251   |     |
| 14   | 4.3  | 4.2  | 0.0  | scaffold30_5,823,614-5,844,139  | 12894 | 12917 | (7099) + (CATT)n        | Simple_repeat      | 1      | 25   | (0)    | 252   |     |
| 442  | 8.5  | 0.2  | 1.3  | scaffold30_5,823,614-5,844,139  | 13517 | 13598 | (6928) + L1-L1_Ame      | LINE/L1            | 6162   | 6216 | (631)  | 253   |     |
| 1393 | 8.6  | 0.0  | 0.5  | scaffold30_5,823,614-5,844,139  | 13861 | 14058 | (6468) + L1-L1_Ame      | LINE/L1            | 6651   | 6847 | (0)    | 253   |     |
| 62   | 0.0  | 4.5  | 0.0  | scaffold30_5,823,614-5,844,139  | 14941 | 15006 | (5520) + (TTTTT)n       | Simple_repeat      | 1      | 69   | (0)    | 254   |     |
| 15   | 21.1 | 0.0  | 0.0  | scaffold30_5,823,614-5,844,139  | 15036 | 15064 | (5462) + G4-rich        | Low_complexity     | 1      | 29   | (0)    | 255   |     |
| 532  | 21.9 | 0.8  | 0.0  | scaffold30_5,823,614-5,844,139  | 15070 | 15188 | (5338) + SINEC2_Ame     | SINE/rRNA          | (13)   | 120  | 1      | 256   |     |
| 447  | 27.6 | 10.1 | 1.9  | scaffold30_5,823,614-5,844,139  | 16110 | 16356 | (4170) + LTR37b         | LTR/ERV1           | 197    | 463  | (5)    | 257   |     |
| 325  | 31.4 | 4.7  | 1.5  | scaffold30_5,823,614-5,844,139  | 16398 | 16555 | (3971) + C MIR          | SINE/MIR           | (0)    | 274  | 105    | 258   |     |
| 781  | 21.1 | 7.3  | 2.1  | scaffold30_5,823,614-5,844,139  | 16814 | 16    |                         |                    |        |      |        |       |     |

|      |      |      |     |                                  |       |       |         |   |                |                   |        |      |        |     |
|------|------|------|-----|----------------------------------|-------|-------|---------|---|----------------|-------------------|--------|------|--------|-----|
| 313  | 28.6 | 12.1 | 0.6 | scaffold42_16,713,922-16,693,294 | 11941 | 12081 | (8578)  | C | MER91A         | DNA/hAT-Tip100    | (4)    | 192  | 36     | 290 |
| 255  | 17.1 | 0.0  | 0.5 | scaffold42_16,713,922-16,693,294 | 12502 | 12565 | (8094)  | C | Charlie7b_Mars | DNA/hAT-Charlie   | (148)  | 124  | 62     | 291 |
| 361  | 18.7 | 0.0  | 0.0 | scaffold42_16,713,922-16,693,294 | 13052 | 13117 | (75)    | C | MIR3           | SINE/MIR          | 124    | 189  | (19)   | 292 |
| 122  | 28.4 | 11.9 | 0.0 | scaffold42_16,713,922-16,693,294 | 13365 | 13431 | (7228)  | C | MIR3           | SINE/MIR          | 90     | 164  | (44)   | 293 |
| 1642 | 19.5 | 16.8 | 5.9 | scaffold42_16,713,922-16,693,294 | 13600 | 14122 | (6537)  | C | CorLTR2        | LTR/ERV1          | 2      | 578  | (0)    | 294 |
| 398  | 23.2 | 16.1 | 0.7 | scaffold42_16,713,922-16,693,294 | 14146 | 14275 | (6384)  | C | LTR33          | LTR/ERV1          | (2)    | 513  | 364    | 295 |
| 2480 | 17.6 | 4.8  | 0.0 | scaffold42_16,713,922-16,693,294 | 14727 | 15057 | (5602)  | C | CorLTR2        | LTR/ERV1          | (0)    | 578  | 253    | 296 |
| 2725 | 13.6 | 1.4  | 0.2 | scaffold42_16,713,922-16,693,294 | 15058 | 15486 | (5173)  | C | CorERV2b2_LTR  | LTR/ERV1          | (0)    | 434  | 1      | 297 |
| 2480 | 17.6 | 4.8  | 0.0 | scaffold42_16,713,922-16,693,294 | 15487 | 15755 | (4904)  | C | CorLTR2        | LTR/ERV1          | (326)  | 252  | 1      | 296 |
| 198  | 33.8 | 1.3  | 0.0 | scaffold42_16,713,922-16,693,294 | 15756 | 15832 | (4827)  | C | MIRb           | SINE/MIR          | 113    | 190  | (78)   | 298 |
| 259  | 30.8 | 0.0  | 0.0 | scaffold42_16,713,922-16,693,294 | 16511 | 16575 | (4084)  | C | MIRb           | SINE/MIR          | 122    | 186  | (82)   | 299 |
| 30   | 0.0  | 0.0  | 0.0 | scaffold42_16,713,922-16,693,294 | 16913 | 16938 | (3721)  | C | (AC)n          | Simple_repeat     | 1      | 26   | (0)    | 300 |
| 18   | 33.9 | 0.0  | 0.0 | scaffold42_16,713,922-16,693,294 | 16940 | 16994 | (3665)  | C | (CA)n          | Simple_repeat     | 1      | 55   | (0)    | 301 |
| 399  | 27.5 | 1.1  | 0.0 | scaffold42_16,713,922-16,693,294 | 17165 | 17255 | (3404)  | C | Mon1g1         | SINE/MIR          | 59     | 150  | (153)  | 302 |
| 915  | 25.4 | 3.8  | 2.8 | scaffold42_16,713,922-16,693,294 | 17720 | 18006 | (2653)  | C | LIME3A         | LINE/L1           | 5861   | 6150 | (23)   | 303 |
| 270  | 21.0 | 7.4  | 0.0 | scaffold42_16,713,922-16,693,294 | 18129 | 18209 | (2450)  | C | MIRb           | SINE/MIR          | (82)   | 186  | 100    | 304 |
| 1710 | 5.0  | 0.0  | 0.0 | scaffold42_16,713,922-16,693,294 | 18300 | 18500 | (2159)  | C | SINEC1_Ame     | SINE/rRNA         | 1      | 201  | (0)    | 305 |
| 14   | 4.3  | 0.0  | 7.7 | scaffold42_16,713,922-16,693,294 | 19251 | 19278 | (1381)  | C | (AAT)n         | Simple_repeat     | 1      | 26   | (0)    | 306 |
| 396  | 21.8 | 10.9 | 9.1 | scaffold42_16,713,922-16,693,294 | 19833 | 20080 | (579)   | C | MamRep38       | DNA/hAT           | 1      | 252  | (43)   | 307 |
| 1990 | 21.1 | 4.7  | 0.5 | scaffold42_16,713,922-16,693,294 | 20253 | 20653 | (6)     | C | LTR3_EC        | LTR/ERV1          | (8)    | 740  | 323    | 308 |
| 449  | 30.0 | 0.6  | 1.8 | scaffold52_8,175,534-8,196,159   | 1     | 175   | (20453) | C | L2z            | LINE/L2           | 2445   | 2615 | (804)  | 309 |
| 1140 | 10.8 | 15.3 | 0.9 | scaffold52_8,175,534-8,196,159   | 181   | 376   | (20250) | C | SINEC1B_Ame    | SINE/rRNA         | (4)    | 224  | 1      | 310 |
| 424  | 30.4 | 6.8  | 0.0 | scaffold52_8,175,534-8,196,159   | 380   | 540   | (20086) | C | L2z            | LINE/L2           | 2605   | 2776 | (643)  | 309 |
| 405  | 26.2 | 6.0  | 0.9 | scaffold52_8,175,534-8,196,159   | 584   | 813   | (19813) | C | L2z            | LINE/L2           | 2868   | 3162 | (264)  | 309 |
| 399  | 17.5 | 2.4  | 2.4 | scaffold52_8,175,534-8,196,159   | 814   | 895   | (19731) | C | MER34C_EC      | LTR/ERV1          | (20)   | 582  | 501    | 311 |
| 651  | 20.3 | 0.8  | 0.8 | scaffold52_8,175,534-8,196,159   | 912   | 1035  | (19591) | C | SINEC2_Ame     | SINE/rRNA         | 1      | 124  | (9)    | 312 |
| 302  | 13.0 | 14.5 | 0.5 | scaffold52_8,175,534-8,196,159   | 1036  | 1124  | (19502) | C | SINEC2_C2      | SINE/rRNA         | 125    | 225  | (0)    | 313 |
| 1197 | 20.2 | 13.0 | 0.3 | scaffold52_8,175,534-8,196,159   | 1118  | 1451  | (19173) | C | MER34C_EC      | LTR/ERV1          | (142)  | 379  | 1      | 311 |
| 379  | 25.8 | 10.8 | 3.1 | scaffold52_8,175,534-8,196,159   | 1454  | 1615  | (19011) | C | L2z            | LINE/L2           | 3161   | 3339 | (87)   | 309 |
| 33   | 0.0  | 0.0  | 0.0 | scaffold52_8,175,534-8,196,159   | 1616  | 1646  | (18980) | C | (T)n           | Simple_repeat     | 1      | 31   | (0)    | 314 |
| 379  | 22.0 | 8.8  | 1.9 | scaffold52_8,175,534-8,196,159   | 1647  | 1716  | (18910) | C | L2z            | LINE/L2           | 3311   | 3388 | (38)   | 309 |
| 422  | 30.6 | 3.5  | 2.5 | scaffold52_8,175,534-8,196,159   | 2286  | 2483  | (18143) | C | LIME4b         | LINE/L1           | 5928   | 6127 | (18)   | 315 |
| 16   | 15.5 | 0.0  | 2.7 | scaffold52_8,175,534-8,196,159   | 3915  | 3991  | (16620) | C | (TCATTC)n      | Simple_repeat     | 1      | 20   | (0)    | 316 |
| 260  | 38.0 | 0.6  | 4.4 | scaffold52_8,175,534-8,196,159   | 4788  | 4952  | (15674) | C | MIR            | SINE/MIR          | 53     | 211  | (53)   | 317 |
| 12   | 14.4 | 0.0  | 0.0 | scaffold52_8,175,534-8,196,159   | 5589  | 5612  | (15014) | C | (TAA)n         | Simple_repeat     | 1      | 24   | (0)    | 318 |
| 445  | 25.5 | 0.0  | 0.9 | scaffold52_8,175,534-8,196,159   | 6322  | 6432  | (14194) | C | MIR            | SINE/MIR          | 61     | 170  | (92)   | 319 |
| 207  | 16.7 | 0.0  | 0.0 | scaffold52_8,175,534-8,196,159   | 6444  | 6479  | (14147) | C | L2b            | LINE/L2           | 3322   | 3357 | (18)   | 320 |
| 218  | 17.5 | 0.0  | 2.5 | scaffold52_8,175,534-8,196,159   | 6450  | 6490  | (14136) | C | MIRb           | SINE/MIR          | 225    | 264  | (4)    | 321 |
| 183  | 16.1 | 0.0  | 0.0 | scaffold52_8,175,534-8,196,159   | 7620  | 7650  | (12925) | C | L2             | LINE/L2           | (1086) | 234  | 2353   | 322 |
| 319  | 34.9 | 10.1 | 3.3 | scaffold52_8,175,534-8,196,159   | 7955  | 7881  | (12745) | C | MIR            | SINE/MIR          | (18)   | 249  | 8      | 323 |
| 396  | 33.8 | 5.6  | 2.6 | scaffold52_8,175,534-8,196,159   | 8302  | 8605  | (12021) | C | L2             | LINE/L2           | (1368) | 2051 | 1739   | 322 |
| 314  | 32.4 | 2.5  | 5.3 | scaffold52_8,175,534-8,196,159   | 8861  | 9066  | (11560) | C | MIRb           | SINE/MIR          | (26)   | 242  | 45     | 324 |
| 14   | 0.0  | 0.0  | 0.0 | scaffold52_8,175,534-8,196,159   | 9274  | 9291  | (11335) | C | (GTT)n         | Simple_repeat     | 1      | 18   | (0)    | 325 |
| 446  | 23.2 | 4.3  | 5.4 | scaffold52_8,175,534-8,196,159   | 9988  | 10196 | (10430) | C | LTR154A        | LTR/ERV1          | (42)   | 432  | 205    | 326 |
| 194  | 30.4 | 11.1 | 0.7 | scaffold52_8,175,534-8,196,159   | 11714 | 11839 | (8787)  | C | (CT)n          | LINE/L2           | 3249   | 3387 | (0)    | 327 |
| 19   | 14.5 | 0.0  | 0.0 | scaffold52_8,175,534-8,196,159   | 11944 | 11974 | (8652)  | C | (T)n           | Simple_repeat     | 1      | 31   | (0)    | 328 |
| 18   | 4.3  | 0.0  | 4.0 | scaffold52_8,175,534-8,196,159   | 12537 | 12562 | (8064)  | C | (CA)n          | Simple_repeat     | 1      | 25   | (0)    | 329 |
| 712  | 26.4 | 7.6  | 0.8 | scaffold52_8,175,534-8,196,159   | 13041 | 13277 | (7349)  | C | MIR            | SINE/MIR          | (1)    | 261  | 9      | 330 |
| 257  | 30.0 | 3.3  | 0.0 | scaffold52_8,175,534-8,196,159   | 13717 | 13806 | (6820)  | C | L2c            | LINE/L2           | 3292   | 3384 | (3)    | 331 |
| 1582 | 21.1 | 6.4  | 4.3 | scaffold52_8,175,534-8,196,159   | 14339 | 14837 | (5789)  | C | MER34A         | LTR/ERV1          | (6)    | 501  | 2      | 332 |
| 855  | 13.0 | 17.2 | 1.7 | scaffold52_8,175,534-8,196,159   | 15802 | 15178 | (5449)  | C | SINEC2_b1      | SINE/rRNA         | (11)   | 143  | 3      | 333 |
| 189  | 15.8 | 2.6  | 0.0 | scaffold52_8,175,534-8,196,159   | 17561 | 17598 | (3082)  | C | MIR3           | SINE/MIR          | (87)   | 121  | 83     | 334 |
| 12   | 15.8 | 0.0  | 3.5 | scaffold52_8,175,534-8,196,159   | 18154 | 18183 | (2443)  | C | (TGAT)n        | Simple_repeat     | 1      | 29   | (0)    | 335 |
| 184  | 26.1 | 8.7  | 0.0 | scaffold52_8,175,534-8,196,159   | 18374 | 18442 | (2184)  | C | L2b            | LINE/L2           | 3297   | 3371 | (4)    | 336 |
| 589  | 13.6 | 0.9  | 1.9 | scaffold52_8,175,534-8,196,159   | 19084 | 19188 | (1438)  | C | MLT1D          | LTR/ERV1-MaLR     | (0)    | 505  | 402    | 337 |
| 334  | 35.2 | 6.2  | 7.5 | scaffold52_8,175,534-8,196,159   | 19228 | 19700 | (936)   | C | L2b            | LINE/L2           | 2907   | 3372 | (3)    | 338 |
| 230  | 14.7 | 0.0  | 0.0 | scaffold52_13,107,950-13,128,518 | 208   | 223   | (20336) | C | PlasSat2A      | Satellite         | 263    | 296  | (737)  | 339 |
| 510  | 17.2 | 4.2  | 1.6 | scaffold52_13,107,950-13,128,518 | 640   | 757   | (19812) | C | SINEC2_Ame     | SINE/rRNA         | 2      | 122  | (11)   | 340 |
| 14   | 8.8  | 0.0  | 0.0 | scaffold52_13,107,950-13,128,518 | 805   | 828   | (19741) | C | (AATT)n        | Simple_repeat     | 1      | 24   | (0)    | 341 |
| 245  | 33.6 | 6.2  | 0.0 | scaffold52_13,107,950-13,128,518 | 1049  | 1161  | (19408) | C | MIRb           | SINE/MIR          | 41     | 160  | (108)  | 342 |
| 440  | 28.2 | 7.8  | 3.6 | scaffold52_13,107,950-13,128,518 | 1175  | 1417  | (19152) | C | MamRep1527     | LTR               | (466)  | 503  | 251    | 343 |
| 2305 | 18.3 | 9.8  | 0.0 | scaffold52_13,107,950-13,128,518 | 2220  | 2677  | (17892) | C | MLT1D          | LTR/ERV1-MaLR     | (0)    | 505  | 3      | 344 |
| 167  | 29.6 | 0.0  | 0.0 | scaffold52_13,107,950-13,128,518 | 2764  | 2817  | (17752) | C | L2c            | LINE/L2           | (37)   | 3350 | 3297   | 345 |
| 494  | 28.5 | 9.4  | 0.9 | scaffold52_13,107,950-13,128,518 | 2843  | 3044  | (17525) | C | MIR            | SINE/MIR          | (18)   | 244  | 26     | 346 |
| 15   | 33.0 | 0.0  | 0.0 | scaffold52_13,107,950-13,128,518 | 3170  | 3221  | (17348) | C | (ATG)n         | Simple_repeat     | 1      | 52   | (0)    | 347 |
| 27   | 0.0  | 0.0  | 0.0 | scaffold52_13,107,950-13,128,518 | 4694  | 4719  | (15850) | C | (TTAT)n        | Simple_repeat     | 1      | 26   | (0)    | 348 |
| 1114 | 8.0  | 0.7  | 0.0 | scaffold52_13,107,950-13,128,518 | 4728  | 4877  | (15692) | C | L1-L1_Ame      | LINE/L1           | (18)   | 6829 | 6679   | 349 |
| 1506 | 22.4 | 7.2  | 7.0 | scaffold52_13,107,950-13,128,518 | 4939  | 5437  | (15132) | C | MLT1D          | LTR/ERV1-MaLR     | (3)    | 502  | 3      | 350 |
| 234  | 20.3 | 3.3  | 3.3 | scaffold52_13,107,950-13,128,518 | 5538  | 5598  | (14971) | C | L3             | LINE/rRNA         | 3413   | 3473 | (66)   | 351 |
| 205  | 28.4 | 5.6  | 7.0 | scaffold52_13,107,950-13,128,518 | 5659  | 5802  | (14767) | C | MIRb           | SINE/MIR          | (30)   | 338  | 97     | 352 |
| 16   | 3.2  | 8.8  | 2.8 | scaffold52_13,107,950-13,128,518 | 5961  | 5994  | (14575) | C | (AAC)n         | Simple_repeat     | 1      | 36   | (0)    | 353 |
| 941  | 28.2 | 5.7  | 2.9 | scaffold52_13,107,950-13,128,518 | 6204  | 6605  | (13964) | C | L2             | LINE/L2           | 1597   | 2009 | (1410) | 354 |
| 387  | 27.3 | 1.1  | 0.0 | scaffold52_13,107,950-13,128,518 | 6606  | 6693  | (13876) | C | MER94          | DNA/hAT-Blackjack | (0)    | 134  | 46     | 355 |
| 828  | 29.6 | 12.1 | 4.1 | scaffold52_13,107,950-13,128,518 | 6733  | 7138  | (1343)  | C | LTR16          | LTR/ERV1          | (1)    | 437  | 1      | 356 |
| 533  | 32.2 | 2.1  | 0.4 | scaffold52_13,107,950-13,128,518 | 7171  | 7404  | (12165) | C | L2             | LINE/L2           | 2012   | 2249 | (1170) | 354 |
| 822  | 26.2 | 0.9  | 0.0 | scaffold52_13,107,950-13,128,518 | 7432  | 7641  | (12028) | C | MER58A         | DNA/hAT-Charlie   | 5      | 222  | (2)    | 357 |
| 388  | 28.5 | 9.1  | 3.2 | scaffold52_13,107,950-13,128,518 | 7679  | 7804  | (12765) | C | L2a            | LINE/L2           | 3107   | 3250 | (176)  | 358 |
| 2164 | 18.4 | 0.9  | 6.8 | scaffold52_13,107,950-13,128,518 | 7805  | 8242  | (12327) | C | MLT2D          | LTR/ERV1          | (0)    | 414  | 1      | 359 |
| 383  | 27.6 | 8.8  | 4.4 | scaffold52_13,107,950-13,128,518 | 8243  | 8413  | (12156) | C | L2a            | LINE/L2           | 3251   | 3426 | (0)    | 358 |
| 458  | 26.2 | 1.4  | 0.6 | scaffold52_13,107,950-13,128,518 | 8412  | 8575  | (11994) | C | L2             | LINE/L2           | 2305   | 2479 | (940)  | 354 |
| 51   | 23.4 | 6.3  | 3.2 | scaffold52_13,107,950-13,128,518 | 8767  | 8975  | (11594) | C | LTR16B1        | LTR/ERV1          | 191    | 409  | (71)   | 360 |
| 947  | 15.0 | 11.2 | 2.7 | scaffold52_13,107,950-13,128,518 | 10355 | 10560 | (10000) | C | LTR154         | LTR/ERV1          | 285    | 365  | (42)   | 361 |
| 255  | 8.8  | 0.0  | 0.0 | scaffold52_13,107,950-13,128,518 | 11982 | 12186 | (8383)  | C | SINEC1B_Ame    | SINE/rRNA         | 1      | 222  | (6)    | 362 |
| 311  | 31.2 | 2.8  | 5.8 | scaffold52_13,107,950-13,128,518 | 12713 | 12746 | (7823)  | C | MARE8          | DNA               | 148    | 181  | (119)  | 363 |
| 728  | 16.4 | 4.3  | 5.3 | scaffold52_13,107,950-13,128,518 | 13070 | 13246 | (7323)  | C | MERSA          | DNA/hAT-Charlie   | (0)    |      |        |     |



|      |      |      |     |                                 |       |       |                       |                  |        |      |        |       |
|------|------|------|-----|---------------------------------|-------|-------|-----------------------|------------------|--------|------|--------|-------|
| 274  | 13.0 | 1.5  | 9.5 | scaffold7_30,636,998-30,609,301 | 10612 | 10679 | (17019) + KORV_I-int  | LTR/ERV1         | 1      | 63   | (7500) | 394   |
| 745  | 30.9 | 0.7  | 1.7 | scaffold7_30,636,998-30,609,301 | 11111 | 11400 | (16298) + KORV_I-int  | LTR/ERV1         | 457    | 743  | (6681) | 394   |
| 6801 | 29.8 | 3.3  | 3.6 | scaffold7_30,636,998-30,609,301 | 11653 | 16299 | (11400) + KORV_I-int  | LTR/ERV1         | 1824   | 5682 | (1742) | 394   |
| 360  | 35.2 | 0.0  | 0.0 | scaffold7_30,636,998-30,609,301 | 16357 | 16498 | (11200) + KORV_I-int  | LTR/ERV1         | 5813   | 5954 | (1470) | 394   |
| 291  | 28.4 | 0.0  | 0.0 | scaffold7_30,636,998-30,609,301 | 16537 | 16610 | (11088) + KORV_I-int  | LTR/ERV1         | 6023   | 6096 | (1328) | 394   |
| 891  | 33.4 | 3.0  | 2.6 | scaffold7_30,636,998-30,609,301 | 16658 | 17118 | (10580) + KORV_I-int  | LTR/ERV1         | 6962   | 7424 | (0)    | 394   |
| 491  | 21.7 | 5.1  | 2.5 | scaffold7_30,636,998-30,609,301 | 17532 | 17687 | (10011) + LTRIS4      | LTR/ERV1         | 309    | 468  | (39)   | 395   |
| 470  | 28.4 | 5.7  | 4.4 | scaffold7_30,636,998-30,609,301 | 17751 | 17997 | (9701) + L2a          | LINE/L2          | 3075   | 3324 | (102)  | 392   |
| 239  | 28.1 | 0.0  | 0.0 | scaffold7_30,636,998-30,609,301 | 18017 | 18080 | (9618) + L2b_ME       | LINE/L2          | 3383   | 3446 | (1)    | 396   |
| 878  | 24.2 | 7.3  | 2.4 | scaffold7_30,636,998-30,609,301 | 19798 | 20110 | (7588) C LIME4a       | LINE/L1          | (4)    | 6120 | 5793   | 397   |
| 589  | 42.8 | 7.4  | 0.5 | scaffold7_30,636,998-30,609,301 | 20154 | 20355 | (7343) + SINEC1B_Ame  | SINE/rRNA        | 1      | 216  | (12)   | 398   |
| 677  | 11.7 | 1.9  | 1.9 | scaffold7_30,636,998-30,609,301 | 20592 | 20696 | (7002) + SINEC_old    | SINE/rRNA        | 1      | 105  | (7)    | 399   |
| 421  | 27.3 | 1.6  | 0.8 | scaffold7_30,636,998-30,609,301 | 20699 | 20820 | (6878) + SINEC2_Ame   | SINE/rRNA        | 2      | 124  | (9)    | 400   |
| 23   | 13.1 | 0.0  | 2.3 | scaffold7_30,636,998-30,609,301 | 20851 | 20894 | (6804) + A-rich       | Low_complexity   | 1      | 43   | (0)    | 401   |
| 338  | 22.9 | 2.9  | 0.0 | scaffold7_30,636,998-30,609,301 | 20981 | 21050 | (6644) + rRNA-Lys-AAG | rRNA             | 2      | 73   | (3)    | 402   |
| 15   | 15.8 | 0.0  | 2.8 | scaffold7_30,636,998-30,609,301 | 21062 | 21098 | (6600) + A-rich       | Low_complexity   | 1      | 36   | (0)    | 403   |
| 691  | 18.8 | 13.1 | 4.0 | scaffold7_30,636,998-30,609,301 | 21143 | 21325 | (6373) C SINEC1_Ame   | SINE/rRNA        | (2)    | 199  | 1      | 404   |
| 315  | 21.8 | 10.8 | 0.9 | scaffold7_30,636,998-30,609,301 | 21326 | 21439 | (6259) + LIME4c       | LINE/L1          | 5459   | 5582 | (501)  | 405   |
| 421  | 13.6 | 0.0  | 0.0 | scaffold7_30,636,998-30,609,301 | 21525 | 21590 | (6108) C CorL1R1-int  | LTR/ERV1         | (517)  | 6098 | 6033   | 406   |
| 1638 | 21.8 | 9.4  | 0.0 | scaffold7_30,636,998-30,609,301 | 21736 | 22350 | (5348) C CorERV2-int  | LTR/ERV1         | (1380) | 6232 | 5560   | 407   |
| 4729 | 20.8 | 2.5  | 1.2 | scaffold7_30,636,998-30,609,301 | 22361 | 23325 | (4373) C CorERV2-int  | LTR/ERV1         | (2702) | 4910 | 3934   | 407   |
| 284  | 32.8 | 6.7  | 0.8 | scaffold7_30,636,998-30,609,301 | 23327 | 23446 | (4252) C CorERV2-int  | LTR/ERV1         | (3927) | 3497 | 3371   | 407   |
| 2821 | 13.7 | 5.5  | 0.8 | scaffold7_30,636,998-30,609,301 | 23448 | 23904 | (3794) C CorERV2-int  | LTR/ERV1         | (3809) | 3803 | 3326   | 408   |
| 226  | 37.9 | 4.9  | 0.4 | scaffold7_30,636,998-30,609,301 | 23905 | 24169 | (3529) C CorERV2-int  | LTR/ERV1         | (4534) | 2890 | 2614   | 408   |
| 3844 | 18.4 | 3.6  | 0.4 | scaffold7_30,636,998-30,609,301 | 24170 | 25154 | (2544) C CorERV2-int  | LTR/ERV1         | (4560) | 3052 | 2008   | 409   |
| 672  | 12.3 | 0.0  | 1.9 | scaffold7_30,636,998-30,609,301 | 25158 | 25265 | (2433) + SINEC_old    | SINE/rRNA        | 7      | 112  | (0)    | 410   |
| 2306 | 22.1 | 6.4  | 2.3 | scaffold7_30,636,998-30,609,301 | 25271 | 25626 | (2872) C CorERV2-int  | LTR/ERV1         | (5599) | 2013 | 1556   | 409   |
| 42   | 0.0  | 0.0  | 0.0 | scaffold7_30,636,998-30,609,301 | 25627 | 25662 | (2036) + (AC)n        | Simple_repeat    | 1      | 36   | (0)    | 411   |
| 2306 | 23.0 | 5.3  | 1.7 | scaffold7_30,636,998-30,609,301 | 25663 | 26010 | (1688) C CorERV2-int  | LTR/ERV1         | (5959) | 1653 | 1290   | 409 * |
| 4009 | 16.6 | 5.0  | 3.2 | scaffold7_30,636,998-30,609,301 | 25999 | 27328 | (370) C CorERV2-int   | LTR/ERV1         | (6233) | 1379 | 1      | 409   |
| 1324 | 22.9 | 2.9  | 2.5 | scaffold7_30,636,998-30,609,301 | 27329 | 27677 | (21) C CorL1R1B2      | LTR/ERV1         | (4)    | 542  | 144    | 409   |
| 458  | 16.9 | 16.8 | 0.7 | scaffold80_7,084,287-7,112,941  | 4     | 122   | (28533) C MLTIC       | LTR/ERV1-MaLR    | (59)   | 408  | 271    | 412   |
| 15   | 9.8  | 0.0  | 0.0 | scaffold80_7,084,287-7,112,941  | 210   | 231   | (28424) + (ATT)n      | Simple_repeat    | 1      | 22   | (0)    | 413   |
| 20   | 0.0  | 0.0  | 0.0 | scaffold80_7,084,287-7,112,941  | 233   | 254   | (28401) + (GA)n       | Simple_repeat    | 1      | 22   | (0)    | 414   |
| 16   | 0.0  | 0.0  | 0.0 | scaffold80_7,084,287-7,112,941  | 333   | 350   | (28305) + (A)n        | Simple_repeat    | 1      | 18   | (0)    | 415   |
| 389  | 16.9 | 0.0  | 3.4 | scaffold80_7,084,287-7,112,941  | 419   | 510   | (28145) + L1-1_Ame    | LINE/L1          | 6751   | 6839 | (8)    | 416   |
| 532  | 26.8 | 3.9  | 0.5 | scaffold80_7,084,287-7,112,941  | 511   | 690   | (27965) C MER20B      | DNA/HAT-Charlie  | (401)  | 382  | 197    | 417   |
| 234  | 11.6 | 0.0  | 2.3 | scaffold80_7,084,287-7,112,941  | 705   | 748   | (27907) C MER20B      | DNA/HAT-Charlie  | (702)  | 81   | 39     | 417   |
| 201  | 36.4 | 10.1 | 0.0 | scaffold80_7,084,287-7,112,941  | 1345  | 1452  | (27122) + L3          | LINE/IR1         | 3562   | 3670 | (429)  | 418   |
| 3152 | 16.3 | 6.0  | 3.2 | scaffold80_7,084,287-7,112,941  | 1628  | 1694  | (26961) C LIMB1       | LINE/L1          | (5)    | 6163 | 6111   | 419   |
| 1597 | 7.5  | 0.0  | 0.0 | scaffold80_7,084,287-7,112,941  | 1695  | 1894  | (26761) + SINEC1_Ame  | SINE/rRNA        | 1      | 200  | (1)    | 420   |
| 3152 | 16.3 | 6.0  | 3.2 | scaffold80_7,084,287-7,112,941  | 1895  | 2471  | (26184) C LIMB1       | LINE/L1          | (58)   | 6110 | 5501   | 419   |
| 21   | 23.9 | 1.7  | 0.0 | scaffold80_7,084,287-7,112,941  | 2480  | 2538  | (26117) + (TATA)n     | Simple_repeat    | 1      | 60   | (0)    | 421   |
| 499  | 23.9 | 2.4  | 0.4 | scaffold80_7,084,287-7,112,941  | 2540  | 2684  | (25971) C LIMB1       | LINE/L1          | (1368) | 4977 | 4814   | 419   |
| 333  | 33.7 | 1.7  | 1.1 | scaffold80_7,084,287-7,112,941  | 2685  | 2858  | (25797) C Sor-1_T5y   | Satellite        | (1280) | 1956 | 1782   | 422   |
| 1063 | 16.0 | 2.8  | 2.3 | scaffold80_7,084,287-7,112,941  | 2859  | 2885  | (25770) C LIMB1       | LINE/L1          | (1508) | 4637 | 4611   | 419   |
| 60   | 0.0  | 3.3  | 0.0 | scaffold80_7,084,287-7,112,941  | 2886  | 2946  | (25709) + (AAA)n      | Simple_repeat    | 1      | 63   | (0)    | 423   |
| 1063 | 16.0 | 2.8  | 2.3 | scaffold80_7,084,287-7,112,941  | 2947  | 3136  | (25519) C LIMB1       | LINE/L1          | (1530) | 4610 | 4419   | 419   |
| 378  | 29.4 | 4.2  | 3.6 | scaffold80_7,084,287-7,112,941  | 3581  | 3746  | (24909) C Tigger15a   | DNA/TcMar-Tigger | (416)  | 299  | 133    | 424   |
| 47   | 27.0 | 1.6  | 4.4 | scaffold80_7,084,287-7,112,941  | 4771  | 4955  | (23700) + (TTTC)n     | Simple_repeat    | 1      | 180  | (0)    | 425   |
| 15   | 26.9 | 3.3  | 1.6 | scaffold80_7,084,287-7,112,941  | 5352  | 5592  | (23863) + (ATGATA)n   | Simple_repeat    | 1      | 62   | (0)    | 426   |
| 70   | 13.6 | 0.0  | 2.4 | scaffold80_7,084,287-7,112,941  | 5671  | 5798  | (23857) + (TATATA)n   | Simple_repeat    | 1      | 125  | (0)    | 427   |
| 34   | 0.0  | 0.0  | 0.0 | scaffold80_7,084,287-7,112,941  | 5802  | 5830  | (22825) + (TG)n       | Simple_repeat    | 1      | 29   | (0)    | 428   |
| 257  | 34.2 | 0.8  | 1.7 | scaffold80_7,084,287-7,112,941  | 5841  | 5959  | (22696) + MER5A       | DNA/HAT-Charlie  | 72     | 189  | (0)    | 429   |
| 555  | 33.0 | 2.3  | 0.5 | scaffold80_7,084,287-7,112,941  | 7017  | 7235  | (21420) + MIRb        | SINE/MIR         | 30     | 252  | (16)   | 430   |
| 346  | 29.9 | 12.1 | 1.7 | scaffold80_7,084,287-7,112,941  | 7707  | 8047  | (20608) C L2b         | LINE/L2          | (0)    | 3426 | 3055   | 431   |
| 626  | 22.3 | 2.9  | 8.0 | scaffold80_7,084,287-7,112,941  | 8126  | 8335  | (20320) + SINEC1_Ame  | SINE/rRNA        | 1      | 200  | (1)    | 432   |
| 17   | 19.5 | 0.0  | 0.0 | scaffold80_7,084,287-7,112,941  | 8337  | 8367  | (20288) + A-rich      | Low_complexity   | 1      | 31   | (0)    | 433   |
| 379  | 22.7 | 6.1  | 4.3 | scaffold80_7,084,287-7,112,941  | 10071 | 10185 | (18470) + MIRb        | SINE/MIR         | 20     | 136  | (132)  | 434   |
| 16   | 21.8 | 2.6  | 0.0 | scaffold80_7,084,287-7,112,941  | 11842 | 11879 | (16776) + (TA)n       | Simple_repeat    | 1      | 39   | (0)    | 435   |
| 522  | 21.4 | 4.1  | 4.0 | scaffold80_7,084,287-7,112,941  | 12014 | 12219 | (16436) C LTRIS4      | LTR/ERV1         | (42)   | 465  | 205    | 436   |
| 353  | 26.1 | 7.7  | 2.1 | scaffold80_7,084,287-7,112,941  | 12960 | 13129 | (15526) + Monig0      | SINE/MIR         | 1      | 179  | (115)  | 437   |
| 239  | 24.7 | 5.7  | 3.3 | scaffold80_7,084,287-7,112,941  | 14690 | 14777 | (13878) + MIR3        | SINE/MIR         | 15     | 104  | (104)  | 438   |
| 541  | 23.4 | 7.6  | 5.3 | scaffold80_7,084,287-7,112,941  | 14912 | 15096 | (13559) + MER5A       | DNA/HAT-Charlie  | 1      | 189  | (0)    | 439   |
| 190  | 33.3 | 6.4  | 1.0 | scaffold80_7,084,287-7,112,941  | 15225 | 15318 | (13337) + L2b         | LINE/L2          | 3264   | 3362 | (13)   | 440   |
| 285  | 31.1 | 2.4  | 2.4 | scaffold80_7,084,287-7,112,941  | 15330 | 15454 | (13201) + MIRb        | SINE/MIR         | 86     | 210  | (58)   | 441   |
| 45   | 6.0  | 0.0  | 0.0 | scaffold80_7,084,287-7,112,941  | 15483 | 15534 | (13121) + (GT)n       | Simple_repeat    | 1      | 52   | (0)    | 442   |
| 400  | 37.2 | 7.7  | 3.0 | scaffold80_7,084,287-7,112,941  | 15622 | 16037 | (12618) C MonGypLTRic | LTR/gypsy        | (119)  | 684  | 250    | 443   |
| 293  | 29.5 | 14.3 | 0.0 | scaffold80_7,084,287-7,112,941  | 16158 | 16262 | (12393) C MonGypLTRic | LTR/gypsy        | (620)  | 193  | 74     | 443   |
| 678  | 27.3 | 1.4  | 2.3 | scaffold80_7,084,287-7,112,941  | 16297 | 16517 | (12138) + MER20       | DNA/HAT-Charlie  | 1      | 219  | (0)    | 444   |
| 456  | 22.4 | 1.0  | 0.0 | scaffold80_7,084,287-7,112,941  | 17181 | 17278 | (11377) C MER45C      | DNA/HAT-Tip100   | (11)   | 942  | 844    | 445   |
| 816  | 9.4  | 24.5 | 4.3 | scaffold80_7,084,287-7,112,941  | 17279 | 17433 | (11222) + SINEC_b1    | SINE/rRNA        | 1      | 185  | (9)    | 446   |
| 39   | 4.1  | 3.4  | 8.2 | scaffold80_7,084,287-7,112,941  | 17438 | 17526 | (11129) + (TA)n       | Simple_repeat    | 1      | 85   | (0)    | 447   |
| 39   | 6.8  | 0.0  | 0.0 | scaffold80_7,084,287-7,112,941  | 17527 | 17573 | (11082) + (TG)n       | Simple_repeat    | 1      | 47   | (0)    | 448   |
| 292  | 19.5 | 0.0  | 3.9 | scaffold80_7,084,287-7,112,941  | 17538 | 17667 | (10985) C MER45C      | DNA/HAT-Tip100   | (97)   | 856  | 780    | 445   |
| 1333 | 23.8 | 2.0  | 3.3 | scaffold80_7,084,287-7,112,941  | 18914 | 19460 | (9195) + Arthur2      | DNA/HAT-Tip100   | 442    | 981  | (2719) | 449   |
| 13   | 22.2 | 3.5  | 5.3 | scaffold80_7,084,287-7,112,941  | 19894 | 19951 | (8704) + (ATT)n       | Simple_repeat    | 1      | 57   | (0)    | 450   |
| 1367 | 21.2 | 10.3 | 0.6 | scaffold80_7,084,287-7,112,941  | 20099 | 20492 | (8163) C LIMA7        | LINE/L1          | (0)    | 6894 | 6510   | 451   |
| 75   | 13.4 | 5.4  | 0.0 | scaffold80_7,084,287-7,112,941  | 20862 | 21008 | (7647) + (AT)n        | Simple_repeat    | 1      | 155  | (0)    | 452   |
| 17   | 0.0  | 0.0  | 0.0 | scaffold80_7,084,287-7,112,941  | 21198 | 21216 | (7439) + (TG)n        | Simple_repeat    | 1      | 19   | (0)    | 453   |
| 16   | 0.0  | 0.0  | 0.0 | scaffold80_7,084,287-7,112,941  | 21216 | 21235 | (7420) + (TA)n        | Simple_repeat    | 1      | 21   | (0)    | 454 * |
| 463  | 29.6 | 6.6  | 0.6 | scaffold80_7,084,287-7,112,941  | 21332 | 21494 | (7161) C MLT1H        | LTR/ERV1-MaLR    | (0)    | 549  | 374    | 455   |
| 266  | 37.1 | 1.0  | 7.2 | scaffold80_7,084,287-7,112,941  | 21541 | 21746 | (6909) C L2c          | LINE/L2          | (200)  | 3187 | 2994   | 456   |
| 51   | 2.1  | 0.0  | 0.0 | scaffold80_7,084,287-7,112,941  | 22417 | 22464 | (6191) + (AC)n        | Simple_repeat    | 1      | 48   | (0)    | 457   |
| 465  | 27.2 | 2.3  | 1.6 | scaffold80_7,084,287-7,112,941  | 22742 | 22937 | (5718) + LIMB7        | LINE/L1          | 5983   | 6183 | (1)    | 458   |
| 231  | 35.6 | 3.3  | 0.0 | scaffold80_7,084,287-7,112,941  | 23168 | 23257 | (5398) C L2a          | LINE/L2          | (30)   | 3396 | 3304   | 459   |
| 37   | 0.0  | 0.0  | 0.0 | scaffold80_7,084,287-7,112,941  | 23468 | 23499 | (5156) + (TG)n        | Simple_repeat    | 1      | 32   | (0)    | 460   |
| 782  | 28.3 | 1.5  | 1.5 | scaffold80_7,084,287-7,112,941  | 23891 | 24091 | (4564) C MER20        | DNA/HAT-Charlie  | (3)    | 216  | 16     | 461   |
| 459  | 28.2 | 2.3  | 0.0 | scaffold80_7,084,287-7,112,941  |       |       |                       |                  |        |      |        |       |
